# Supplementary material
Source: publisher figshare collection journal article supplement (https://karger.figshare.com/ndownloader/files/8717176)
Supplement: Supplementary file 1 [file 8717176]

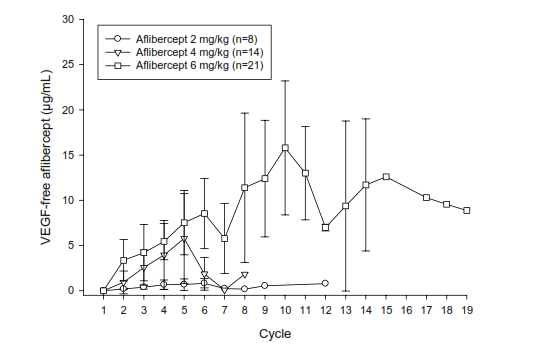
 **Suppl. Fig. 1.** Mean (± standard deviation) free aflibercept Ctrough profiles. Ctrough = Plasma concentration before starting the infusion at each treatment cycle.
